# Supplementary material
Source: PubMed Central journal article supplement (PMC3078127)

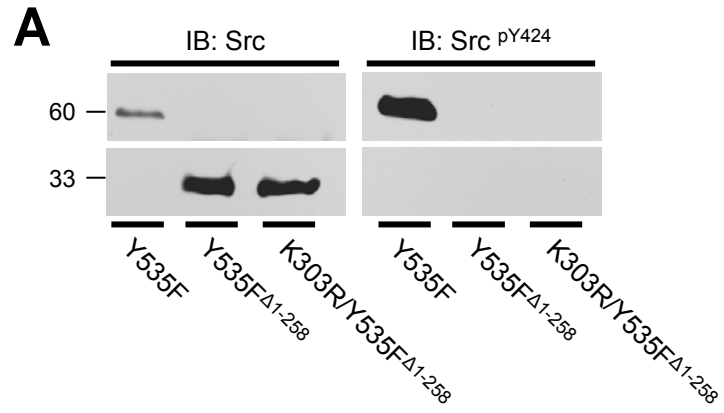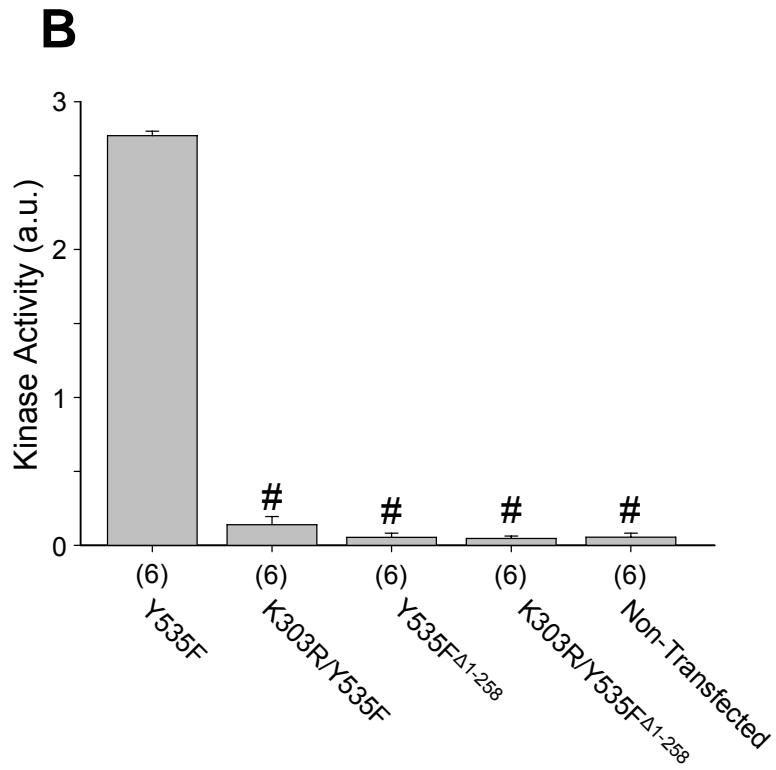

Supplement: NIHMS257191-supplement-Supp_Fig_S1.pdf [file NIHMS257191-supplement-Supp_Fig_S1.pdf]
